# Supplementary material for: Functional molecule guided evolution of MnOx nanostructure patterns on N-graphene and their oxygen reduction activity
Source: Royal Society of Chemistry journal article supplement (doi:10.1039/c9ra04677a), 2019-01-01
Supplement: c9ra04677a1.pdf [file c9ra04677a1.pdf]

## Supporting Information

### **Functional Molecule Guided Evolution of MnO<sub>x</sub> Nanostructure Patterns on N-Graphene and Their Oxygen Reduction Activity**

Nibedita Behera, Swarna P. Mantry, Biswaranjan D. Mohapatra, Rajesh K. Behera and  
Kumar S. K. Varadwaj\*

Department of chemistry, Ravenshaw University, Cuttack, Odisha-753003, India.

\*E-mail: [skvaradwaj@ravenshawuniversity.ac.in](mailto:skvaradwaj@ravenshawuniversity.ac.in)

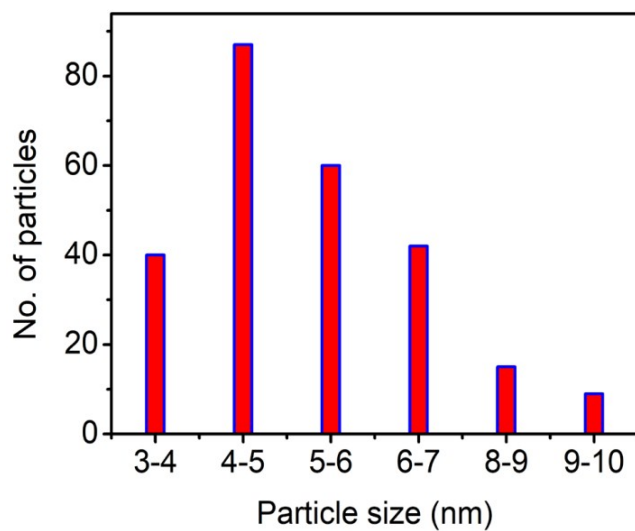

**Figure S1.** Particle size distribution histogram of TMA@NGMnO<sub>x</sub>/6.

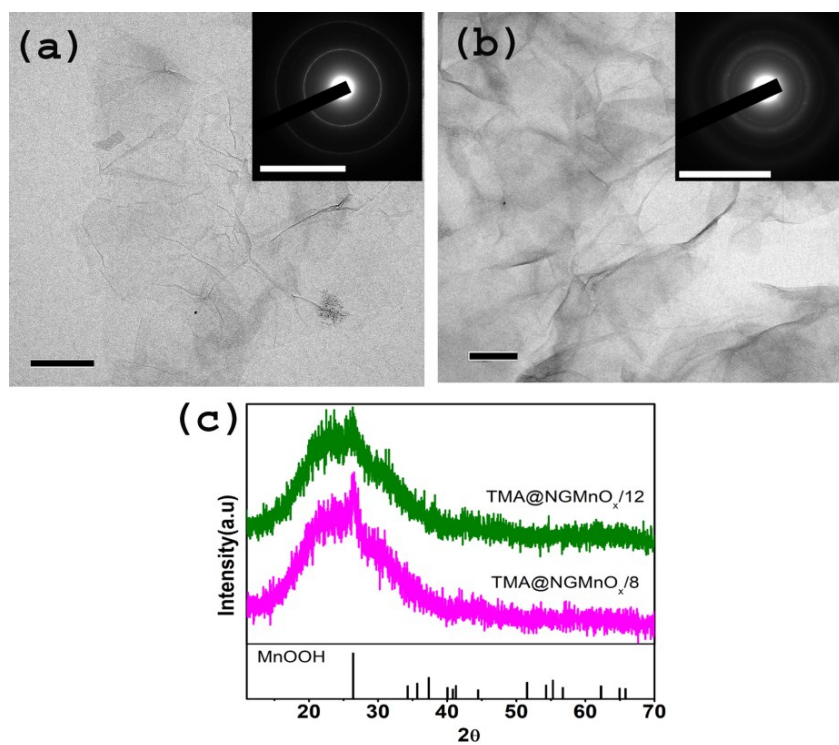

**Figure S2.** TEM images of (a) TMA@NGMnO<sub>x</sub>/8 and (b) TMA@NGMnO<sub>x</sub>/12 (scale bar: 200 nm) and the corresponding SAED patterns (insert) (scale bar: 10 1/nm). (c) The XRD patterns of TMA@NGMnO<sub>x</sub>/8 and TMA@NGMnO<sub>x</sub>/12.

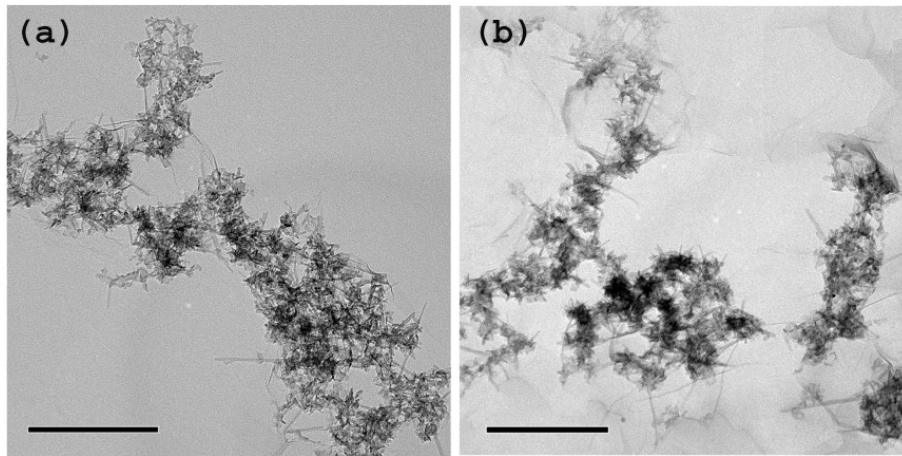

**Figure S3.** TEM images of (a) 0.5TMA@NGMnO<sub>x</sub>/8 and (b) 0.5TMA@NGMnO<sub>x</sub>/12 (scale bar: 200nm).

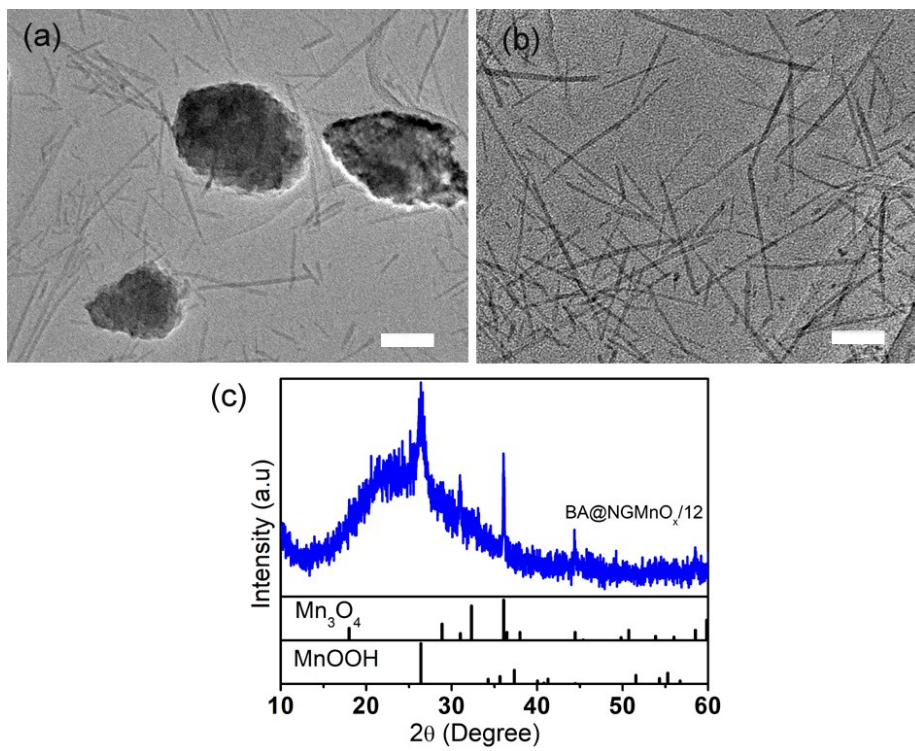

**Figure S4.** TEM images of BA@NGMnO<sub>x</sub>/12 (a) Oval and (b) Wire structures (scale bar: 50 nm). (c) The XRD patterns of BA@NGMnO<sub>x</sub>/12.

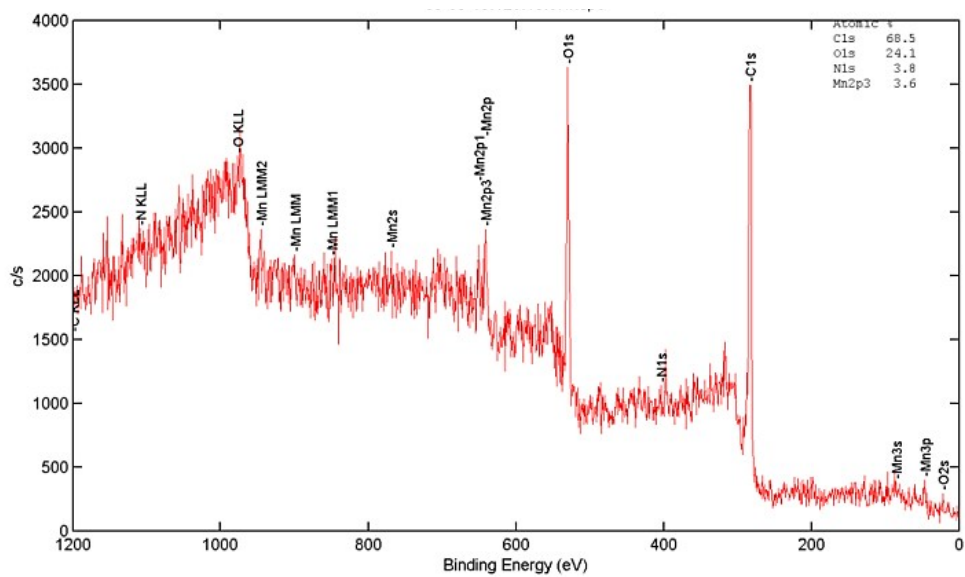

**Figure S5.** Survey scan of TMA@NGMnO<sub>x</sub>/6 hybrid with atomic percentage.

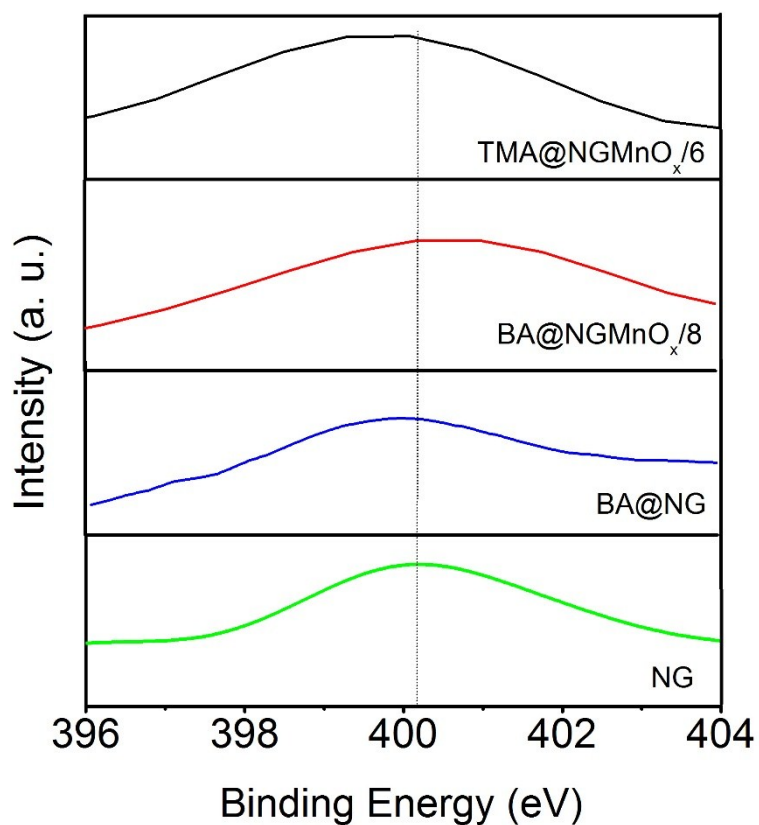

**Figure S6.** Survey scan N 1s XPS spectra for NG, BA@NG, BA@NGMnO<sub>x</sub>/8 and TMA@NGMnO<sub>x</sub>/6 hybrids.

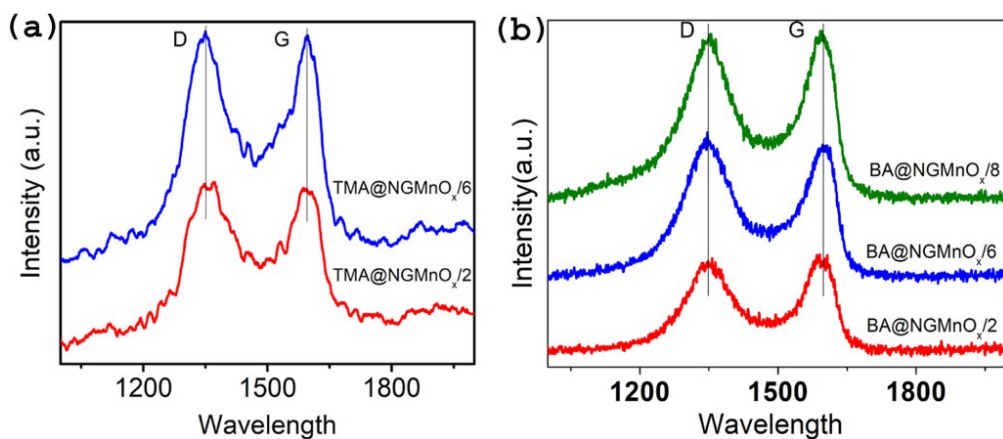

**Figure S7.** Raman spectra of (a) TMA@NGMnO<sub>x</sub>/2 and TMA@NGMnO<sub>x</sub>/6 (b) BA@NGMnO<sub>x</sub>/2, BA@NGMnO<sub>x</sub>/6 and BA@NGMnO<sub>x</sub>/8 hybrids.

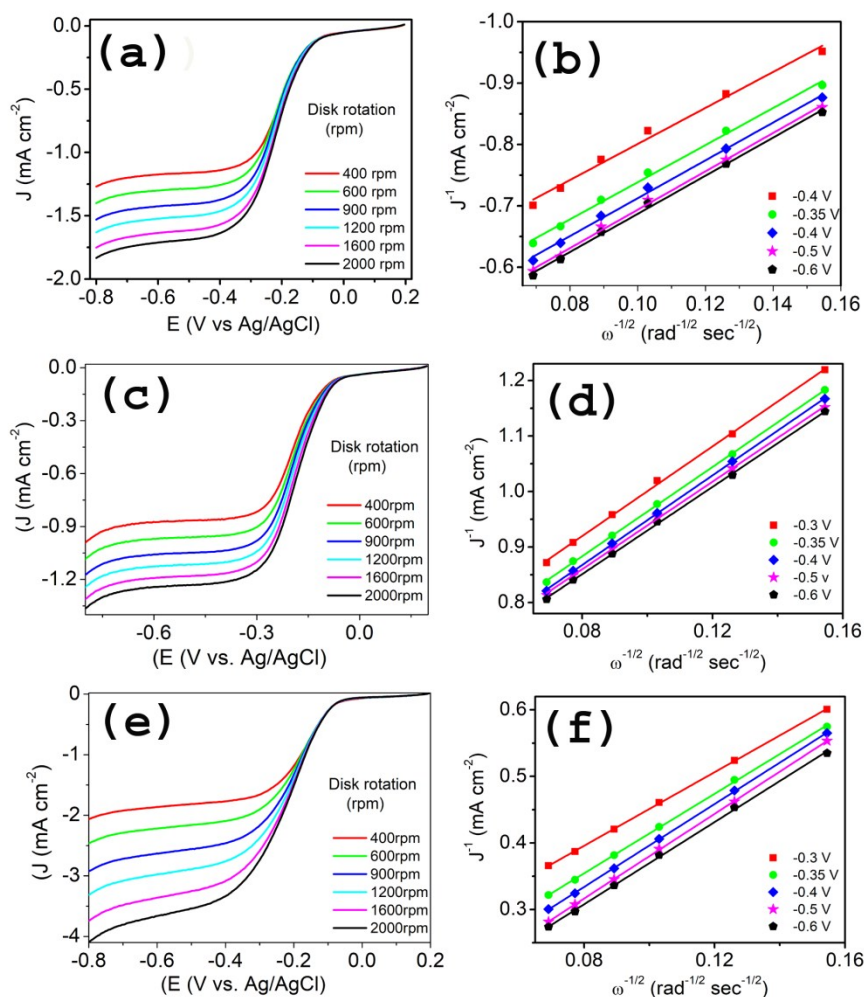

**Figure S8.** RDE plots of (a) TMA@NGMnO<sub>x</sub>/2 (c) BA@NGMnO<sub>x</sub>/2 and (e) BA@NGMnO<sub>x</sub>/8 at different rotation speed. (b), (d) and (f) are the K-L plots of the corresponding catalysts at different potentials.

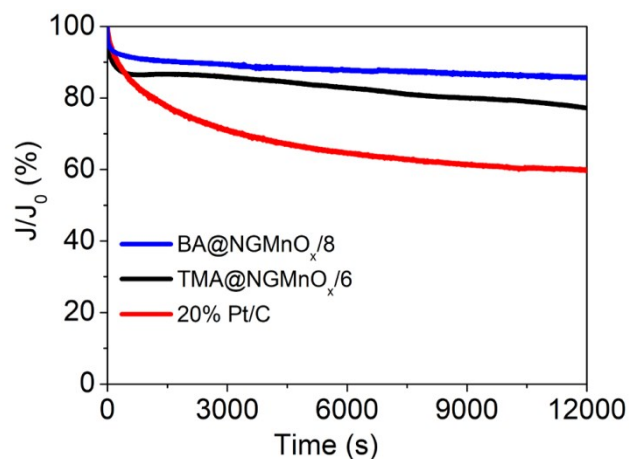

**Figure S9.** Chronoamperometric responses of BA@NGMnO<sub>x</sub>/8, TMA@NGMnO<sub>x</sub>/6 and 20% Pt/C catalysts at -0.22 V in O<sub>2</sub> saturated 0.1 M KOH, which are normalised to initial current responses.

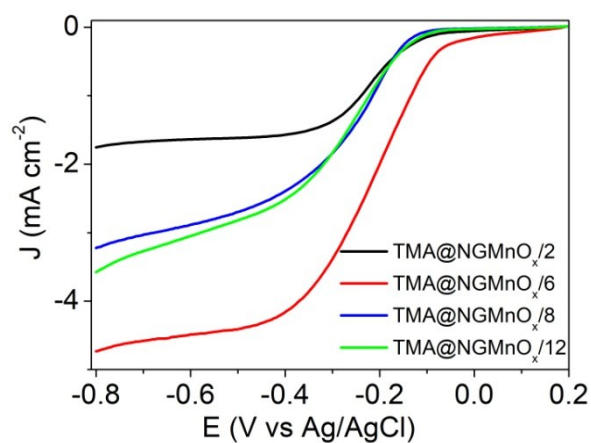

**Figure S10.** LSV curves of TMA@NGMnO<sub>x</sub>/2, TMA@NGMnO<sub>x</sub>/6, TMA@NGMnO<sub>x</sub>/8 and TMA@NGMnO<sub>x</sub>/12 catalysts on RDE in O<sub>2</sub> saturated 0.1 M KOH solution with a rotation speed of 1600 rpm at a scan rate of 10 mV s<sup>-1</sup>.

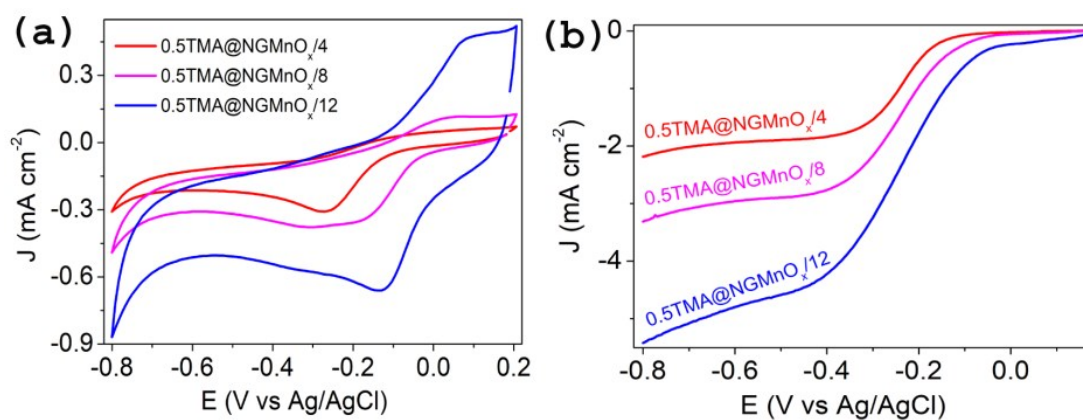

**Figure S11.** (a) Cyclic voltammogram study (b) LSV plots at a rotation speed of 1600 rpm for 0.5TMA@NGMnO<sub>x</sub>/4, 0.5TMA@NGMnO<sub>x</sub>/8 and 0.5TMA@NGMnO<sub>x</sub>/12 nanohybrids, obtained from O<sub>2</sub> saturated 0.1 M KOH solution at a scan rate of 10 mV/sec.

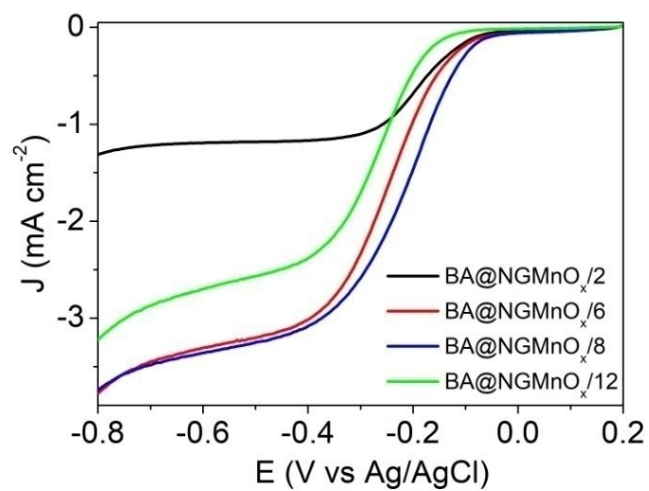

**Figure S12.** LSV curves of BA@NGMnO<sub>x</sub>/2, BA@NGMnO<sub>x</sub>/6, BA@NGMnO<sub>x</sub>/8 and BA@NGMnO<sub>x</sub>/12 catalysts on RDE in O<sub>2</sub> saturated 0.1 M KOH solution with a rotation speed of 1600 rpm at a scan rate of 10 mV/sec.
